# Supplementary material for: MicroRNAs Regulate Metabolic Phenotypes During Multicellular Tumor Spheroids Progression
Source: PubMed Central journal article supplement (PMC7793838; doi:10.3389/fonc.2020.582396), 2020-12-04
Supplement: DataSheet_1.pdf [file DataSheet_1.pdf]

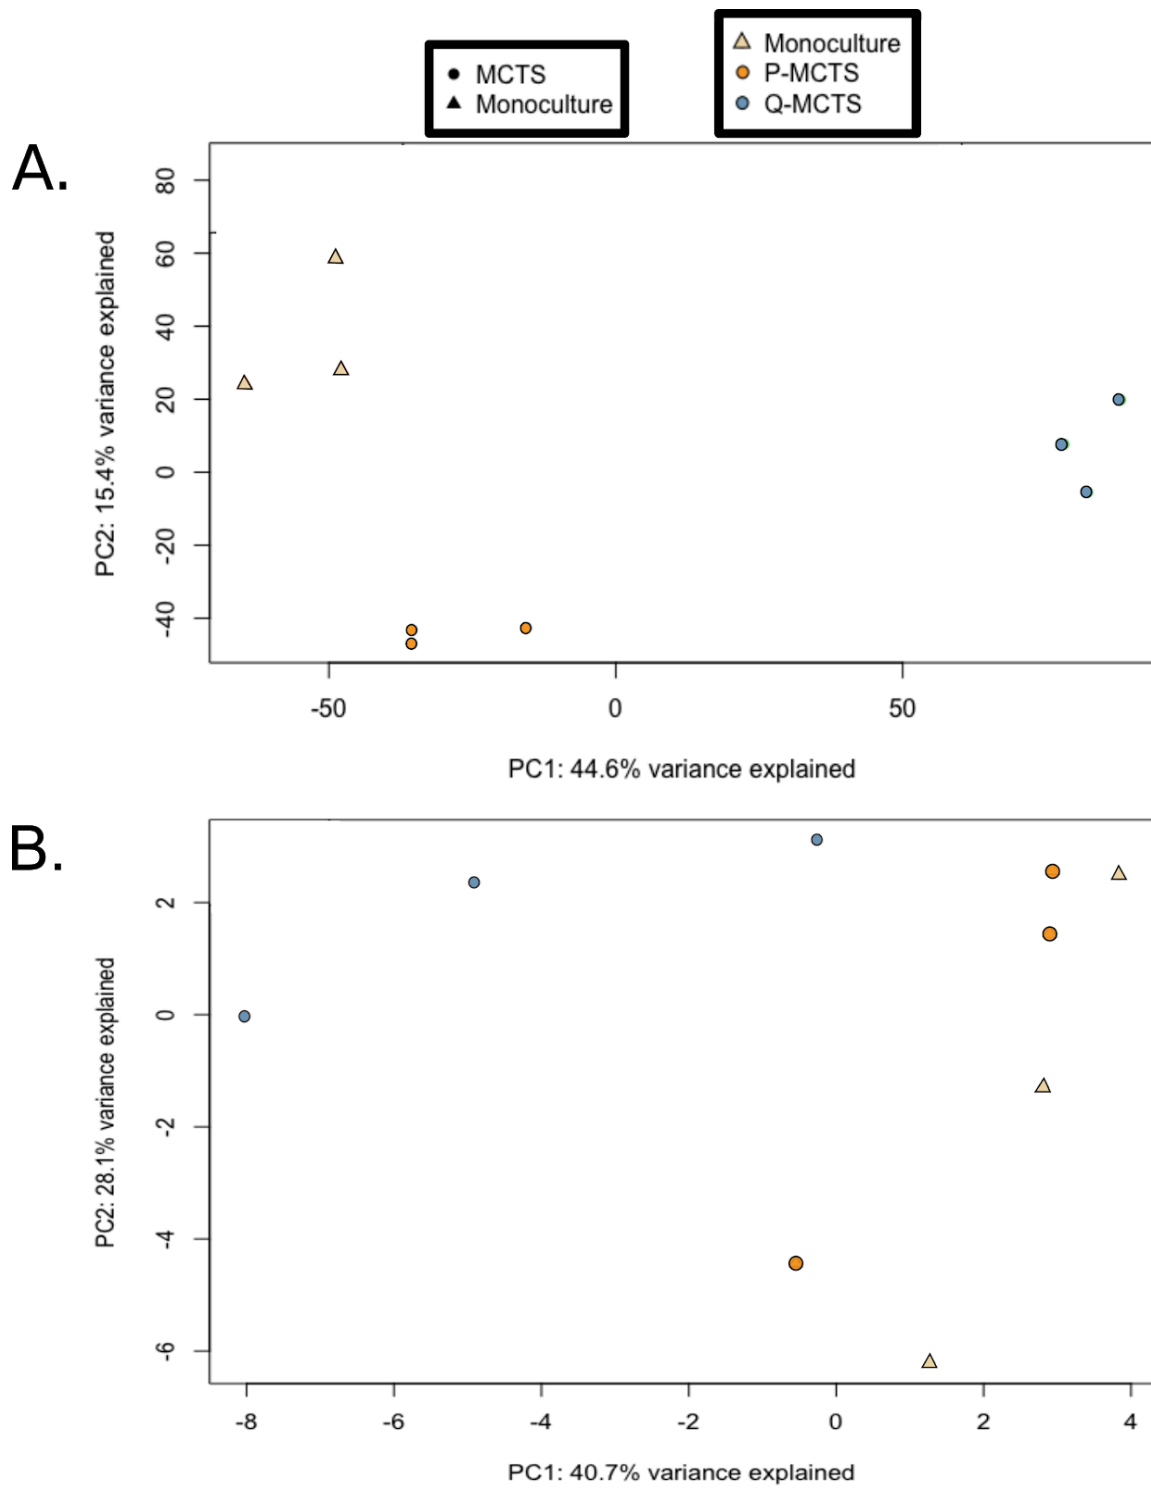

**Figure S1: Principal Component Analysis after data normalization.** **A.** Distribution of the samples after normalization for the mRNA expression data. **B.** Distribution of the samples after normalization for the miRNA expression data.
